# Supplementary material for: Head injury from falls in children younger than 6 years of age
Source: PubMed Central journal article supplement — Arch Dis Child. 2015 Aug 21;100(11):1032–7. doi: 10.1136/archdischild-2014-307119 (PMC4680174; doi:10.1136/archdischild-2014-307119), 2015-08-21
Supplement: archdischild-2014-307119-s1.pdf [file archdischild-2014-307119-s1.pdf]

Supplementary file 1. Classification of objects fallen from

| Furniture/furnishing                             | Object fallen from                                                                                                                                                                                                                                                                                                                       |
|--------------------------------------------------|------------------------------------------------------------------------------------------------------------------------------------------------------------------------------------------------------------------------------------------------------------------------------------------------------------------------------------------|
| Building, building component, or related fitting | <ol style="list-style-type: none"> <li>1. Wall, window, attic</li> <li>2. Other building component or related fitting</li> </ol>                                                                                                                                                                                                         |
| Infant or child product                          | <ol style="list-style-type: none"> <li>1. Changing table/changing mat on table</li> <li>2. Pram/buggy/pushchair</li> <li>3. Cot, Moses basket, carry chair, carseat</li> <li>4. Playground Equipment</li> <li>5. High chair, booster chair</li> <li>6. Bike, scooter and skateboard</li> <li>7. Other infant or child product</li> </ol> |
| Stairs*                                          | <ol style="list-style-type: none"> <li>1. Stairs</li> </ol>                                                                                                                                                                                                                                                                              |
| Persons arms                                     | <ol style="list-style-type: none"> <li>1. Parent's arms to ground</li> <li>2. Child's arms to ground</li> <li>3. Parent's arms down stairs</li> </ol>                                                                                                                                                                                    |
| Other                                            | <ol style="list-style-type: none"> <li>1. Shopping trolley</li> <li>2. Other specified object</li> </ol>                                                                                                                                                                                                                                 |

*\* Due to the large number of cases, stairs were removed from the group 'Building, building component, or related fitting' and made into a separate category*
