# Supplementary material for: Head injury from falls in children younger than 6 years of age
Source: PubMed Central journal article supplement — Arch Dis Child. 2015 Aug 21;100(11):1032–7. doi: 10.1136/archdischild-2014-307119 (PMC4680174; doi:10.1136/archdischild-2014-307119), 2015-08-21
Supplement: archdischild-2014-307119-s2.pdf [file archdischild-2014-307119-s2.pdf]

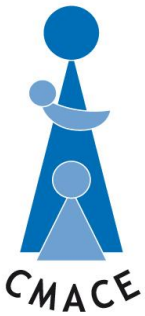

# HEAD INJURY IN CHILDREN

## NOTIFICATION FORM (A)

Please complete this form for a child or young person up to 15 years old (*14 yrs + 365 days*) who as a result of a head injury\* or a head injury as part of a pattern of injuries meets ONE of the following criteria between 1<sup>st</sup> SEPTEMBER 2009 and 28<sup>th</sup> FEBRUARY 2010 inclusive:

Please tick type of case: *(Select one option only)*

- Seen in your Emergency Department and admitted\* to your hospital for secondary or tertiary care **OR**
- Seen in your Emergency Department but transferred for admission\* to secondary or tertiary care at another hospital (within or out of your trust) **OR**
- Seen in your Emergency Department but died before admission\* or transfer\* to secondary care **OR**
- Died at the scene or died between the scene and attendance at the first hospital.

### Instructions for completing and returning the notification form

- Certain sections may not be applicable to all children. Please read the guidance manual before completing.
- Please complete the form using the information available in the child's notes. Complete all dates in the format DD/MM/YY and times using the 24hr clock e.g. 18:50.
- Please keep a copy of this form for your records. Return hardcopies of completed forms to your local CMACE regional office. See back of form for local contact details.**
- If you have any queries about completing or returning this form please contact your CMACE regional office.

Date form completed:

  /   /  

Date form returned:

  /   /  

### DETAILS OF PERSON COMPLETING FORM

|                        |                   |
|------------------------|-------------------|
| <b>Name:</b>           | <b>Trust:</b>     |
| <b>Job title/Role:</b> | <b>Telephone:</b> |
| <b>Unit:</b>           | <b>Email:</b>     |
| <b>Hospital:</b>       |                   |

\* **Head injury:** *Examples of head injuries to include or exclude can be found on the back of this form.*

\* **Admission:** *Hospital admission is defined as occurring when the patient is in receipt of treatment or observation in an inpatient area. This includes short term assessment units associated with wards or emergency departments, short stay units, general or specialist wards, PICUs, Neurosurgical unit, or other inpatient unit. This may only be for a matter of hours beyond the first four hours from arrival at hospital.*

\* **Transfer:** *Refers to the transport of a patient by ambulance (land or air) from one hospital to another hospital facility. Also referred to as an 'inter-hospital transfer' between two hospitals either within or out of the same trust.*

Is this the first hospital the child attended following the incident?

Yes  No  
→ If no, hospital child transferred from \_\_\_\_\_

**SECTION 1: DETAILS OF CHILD**

(Affix patient label if preferred)

1.1 Hospital Number

1.2 NHS Number/Healthcare Number  /  /

1.3 Surname/family name \_\_\_\_\_

1.4 First name \_\_\_\_\_

1.5 Sex  Male  Female  Not known

1.6 Date of birth and/or estimated age  
*If no full date of birth is known enter month and year. If no full or short DOB, enter their estimated age.*  
/ /   Not known  
 years  months

1.7 Address of patient's normal residence \_\_\_\_\_  
Postcode of patient's normal residence  /   Not known

1.8 Ethnic group  Not known

|                                                     |                                                     |                                                     |                                                 |                                                         |
|-----------------------------------------------------|-----------------------------------------------------|-----------------------------------------------------|-------------------------------------------------|---------------------------------------------------------|
| <b>White</b>                                        | <b>Mixed:</b>                                       | <b>Asian or Asian British</b>                       | <b>Black or Black British:</b>                  | <b>Other ethnic groups:</b>                             |
| <input type="checkbox"/> English                    | <input type="checkbox"/> White & Black Caribbean    | <input type="checkbox"/> Indian                     | <input type="checkbox"/> Caribbean              | <input type="checkbox"/> Arab                           |
| <input type="checkbox"/> Other British              | <input type="checkbox"/> White & Black African      | <input type="checkbox"/> Pakistani                  | <input type="checkbox"/> African                | <input type="checkbox"/> Gypsy/ Romany/ Irish Traveller |
| <input type="checkbox"/> Irish                      | <input type="checkbox"/> White & Asian              | <input type="checkbox"/> Bangladeshi                | <input type="checkbox"/> Other Black background | <input type="checkbox"/> Other ethnic group             |
| <input type="checkbox"/> Any other white background | <input type="checkbox"/> Any other Mixed background | <input type="checkbox"/> Chinese                    |                                                 |                                                         |
|                                                     |                                                     | <input type="checkbox"/> Any other Asian background |                                                 |                                                         |

*If other, please specify* \_\_\_\_\_

1.9 Child known to Social Services  Yes  No  Not known  
*If answering this question is not indicated as part of the admission process and you are unaware of whether the child is or is not known to Social Services, tick 'Not known'. i.e. you are not required to call Social Services to answer this question.*

1.10 Child subject of existing child protection plan  Yes  No  Not known

**SECTION 2: DETAILS OF INCIDENT**

2.1 Date of incident / /   Not recorded

2.2 Time of incident :  (24 hr clock)  Not recorded

2.3 Postcode of incident location  /   Not known  
*If postcode is not known indicate area/first line of address* \_\_\_\_\_  Not known

2.4 Place of incident  
 Home/private address  Road/ Street/Motorway  School/ Nursery  Other, specify \_\_\_\_\_  Not known

2.5 Cause of injury  
 Struck by car (i.e. child was pedestrian)  Sport, please specify \_\_\_\_\_  
 Motor vehicle accident (not pedestrian)  Other recreational (e.g. skateboard) specify \_\_\_\_\_  
 Cycling  Assault  
 Fall from > 1m or > 5 stairs  Other, please specify \_\_\_\_\_  
 Fall < 1m or < 5 stairs  Not known  
 Fall, height unknown

2.6 Additional incident details, if known (e.g. Fall from trampoline, speed, not in age appropriate car seat, etc)  
*Please use the additional space provided on page 7 if there is not enough room to complete your answer*

2.7 Suspicion of Non Accidental Injury (NAI)  Yes  No  Not known

2.8 Seatbelt worn  Yes  No  Not known  N/A

2.9 Helmet worn  Yes  No  Not known  N/A



## SECTION 4: EMERGENCY DEPARTMENT

- 4.1 Name of Hospital \_\_\_\_\_
- 4.2 Date of arrival at the Emergency Department DD/MM/YY  Not recorded
- 4.3 Time of arrival at the Emergency Department HH:MM (24 hr clock)  Not recorded

### Previous attendance/s

- 4.4 Was this current visit a re-attendance in relation to a previous injury? (that occurred within 72 hours of this attendance)  Yes → Go to 4.4.1  No → Go to 4.5  Not known → Go to 4.5
- 4.4.1 Name of hospital first attended \_\_\_\_\_  Not known
- 4.4.2 Date attended that hospital DD/MM/YY  Not recorded
- 4.4.3 Time of review at previous attendance HH:MM (24 hr clock)  Not recorded
- 4.4.4 Grade of clinician who discharged child (see codes on page 7)              Not known
- 4.4.5 Head CT scan at previous attendance  Yes  No  Not known

### This attendance

- 4.5 Details of first clinical assessment for this attendance (please refer to codes on page 7)  
This refers to the first clinical assessment (i.e. not included assessment by the triage nurse)
- 4.5.1 Grade of clinician (see codes on page 7)              Not recorded
- 4.5.2 Speciality of clinician (see codes on page 7)           Not recorded
- 4.5.3 Time of first clinical assessment (i.e. not assessment by the triage nurse) HH:MM (24 hr clock)  Not recorded
- 4.6 Following first clinical assessment (i.e. not assessment by triage nurse) was the child referred for consideration by:
- 4.6.1 A more senior member of medical team  Yes  No  Not known
- 4.6.2 Another speciality  Yes  No  Not known
- 4.7 Child's neurological status in the Emergency Department  
Document the worst score before intubation/intervention in the Emergency Department. If no intubation/intervention occurred in the Emergency Department, document the worst score.
- 4.7.1 Glasgow Coma Scale Score  Not recorded
- |                   |  |
|-------------------|--|
| Eye opening       |  |
| Verbal response   |  |
| Motor response    |  |
| TOTAL (out of 15) |  |
- Time GCS recorded: HH:MM (24 hr clock)  Not recorded
- 4.7.2 AVPU Score  Not recorded
- |                  |  |
|------------------|--|
| Alert            |  |
| Respond to Voice |  |
| Respond to Pain  |  |
| Unresponsive     |  |
- Time AVPU recorded: HH:MM (24 hr clock)  Not recorded
- 4.8 Child intubated in the Emergency Department  Yes  No  Not known

## IMAGING

(At any time following attendance)

- 4.8 Head CT scan performed  Yes → Go to 4.8.1  No → Go to 4.8.4  Not known → Go to 4.9
- 4.8.1 Date first head CT scan performed DD/MM/YY  Not recorded
- 4.8.2 Time first head CT scan performed HH:MM (24 hr clock)  Not recorded
- 4.8.3 Was the first head CT scan reported as normal on provisional report?  Yes → Go to 4.9  No → Specify abnormality: \_\_\_\_\_  Not known → Go to 4.9
- 4.8.4 If no head CT performed, please indicate reason/reasons why: (tick all that apply)
- |                                                                    |                                           |                                                      |
|--------------------------------------------------------------------|-------------------------------------------|------------------------------------------------------|
| <input type="checkbox"/> CT scan already done at first hospital    | <input type="checkbox"/> Child not stable | <input type="checkbox"/> Other, please specify _____ |
| <input type="checkbox"/> Not considered to be clinically indicated | <input type="checkbox"/> No CT available  | <input type="checkbox"/> Not known                   |

**IMAGING continued***(At any time following attendance)*

- 4.9 Complete cervical spine CT performed**  Yes → *Go to 4.9.1.*  No → *Go to 4.9.2*  Not known → *Go to 4.10*
- 4.9.1 Was the first spine CT scan reported as normal on provisional report?**  Yes → *Go to 4.10*  No → *Specify abnormality:*  Not known → *Go to 4.10*
- 4.9.2 If no spine CT scan performed please indicate reason/reasons why: (tick all that apply)**
- CT scan already done at first hospital  Child not stable  Other, *please specify* \_\_\_\_\_
- Not considered to be clinically indicated  No CT available  Not known

- 4.10 Was the child 'admitted' to your hospital?**  Yes → *Go to 5.1*  No → *Go to 4.10.1*  
*(see cover for definition of admission)*

**4.10.1 If no, where did child go following discharge from the Emergency Department**

- Transferred to another hospital → *Go to 6.2*
- Deceased → *Go to 6.4*
- Other, *please specify* \_\_\_\_\_ → *Go to 6.1*

**SECTION 5: ADMISSION****5.1 Area child first admitted to:**

- |                                                                           |                                                           |                                           |
|---------------------------------------------------------------------------|-----------------------------------------------------------|-------------------------------------------|
| <input type="checkbox"/> General children's ward                          | <input type="checkbox"/> General/Adult ICU                | <input type="checkbox"/> Theatre          |
| <input type="checkbox"/> Paediatric Intensive Care Unit (PICU)            | <input type="checkbox"/> Adult Neurosurgical unit         | <input type="checkbox"/> Short stay Unit  |
| <input type="checkbox"/> Paediatric Neurosurgical unit                    | <input type="checkbox"/> Adult High Dependency Unit (HDU) | <input type="checkbox"/> Observation unit |
| <input type="checkbox"/> Paediatric High Dependency Unit (PHDU)           | <input type="checkbox"/> Other, <i>specify</i> _____      | <input type="checkbox"/> Not known        |
| <input type="checkbox"/> Specialist children's ward, <i>specify</i> _____ |                                                           |                                           |

**5.2 Date admitted to area**

DD/MM/YY

 *Not recorded***5.3 Time admitted to area**

HH:MM (24 hr clock)

 *Not recorded***5.4 Designated lead team for this admission** *(If joint care tick all that apply)*

- |                                                        |                                                           |                                                      |
|--------------------------------------------------------|-----------------------------------------------------------|------------------------------------------------------|
| <input type="checkbox"/> General Paediatrics           | <input type="checkbox"/> General/Adult Emergency Medicine | <input type="checkbox"/> Not known                   |
| <input type="checkbox"/> Paediatric Emergency Medicine | <input type="checkbox"/> General/Adult Intensive Care     | <input type="checkbox"/> Other, <i>specify</i> _____ |
| <input type="checkbox"/> Paediatric Intensive Care     | <input type="checkbox"/> Adult Neurosurgery               |                                                      |
| <input type="checkbox"/> Paediatric Neurosurgery       | <input type="checkbox"/> General/Adult Surgery            |                                                      |
| <input type="checkbox"/> Paediatric Surgery            | <input type="checkbox"/> Orthopaedic Surgery              |                                                      |

**5.5 Indication for admission***(Please tick all that apply)*

- |                                                                               |                                                                                                                       |
|-------------------------------------------------------------------------------|-----------------------------------------------------------------------------------------------------------------------|
| <input type="checkbox"/> Severity of the head injury                          | <input type="checkbox"/> Recovery from GA or sedation used for CT scan                                                |
| <input type="checkbox"/> Severity of other injuries                           | <input type="checkbox"/> Child fulfils criteria for CT scanning but this cannot be done within the appropriate period |
| <input type="checkbox"/> Severity of mechanism of injury                      | <input type="checkbox"/> Not sufficiently cooperative to allow scanning                                               |
| <input type="checkbox"/> Continuing worrying signs in relation to head injury | <input type="checkbox"/> Admitted for GA to have a CT scan                                                            |
| <input type="checkbox"/> Abnormality identified on CT scan                    | <input type="checkbox"/> Shock                                                                                        |
| <input type="checkbox"/> Base of skull fracture                               | <input type="checkbox"/> Suspected Non Accidental Injury (NAI)                                                        |
| <input type="checkbox"/> Meningism                                            | <input type="checkbox"/> Other, <i>please specify (e.g. not related to head injury, gastroenteritis)</i>              |
| <input type="checkbox"/> CSF leak                                             | _____                                                                                                                 |
| <input type="checkbox"/> Drug or Alcohol intoxication                         |                                                                                                                       |

**5.6 Consultant paediatrician involved in care of child**  
*(i.e. Discussed with at time of care delivered)* Yes  No  Not known**5.7 Neurosurgeon involved in care of child**  
*(This includes liaison over telephone, or other means)* Yes  No  Not known**5.8 Specialist in Child Protection with level 3 training or above involved** *(i.e. Discussed with at time of care delivered)* Yes  No  Not known**5.9 Child Protection referral made to external body**  
*(e.g. Social Services or Police)* Yes  No  Not known**5.10 Skeletal survey undertaken**  
*(i.e. as part of a child protection assessment)* Yes  No  Not known**5.11 Review by ophthalmology undertaken**  
*(i.e. as part of a child protection assessment)* Yes  No  Not known

## SECTION 5: ADMISSION *continued*

5.12 IN ADDITION to the first area of admission, was the child *at any time during the first 72 hours post injury* admitted to any of the following areas?

| Area                              | Yes                      | No                       | Date admitted | Time admitted<br>(24 hr clock) | Date discharged | Time discharged<br>(24 hr clock) |
|-----------------------------------|--------------------------|--------------------------|---------------|--------------------------------|-----------------|----------------------------------|
| a. PICU                           | <input type="checkbox"/> | <input type="checkbox"/> | DD/MM/YY      | HH:MM                          | DD/MM/YY        | HH:MM                            |
| b. PHDU                           | <input type="checkbox"/> | <input type="checkbox"/> | DD/MM/YY      | HH:MM                          | DD/MM/YY        | HH:MM                            |
| c. General ICU                    | <input type="checkbox"/> | <input type="checkbox"/> | DD/MM/YY      | HH:MM                          | DD/MM/YY        | HH:MM                            |
| d. General HDU                    | <input type="checkbox"/> | <input type="checkbox"/> | DD/MM/YY      | HH:MM                          | DD/MM/YY        | HH:MM                            |
| e. Neurosurgical unit             | <input type="checkbox"/> | <input type="checkbox"/> | DD/MM/YY      | HH:MM                          | DD/MM/YY        | HH:MM                            |
| f. Ward                           | <input type="checkbox"/> | <input type="checkbox"/> | DD/MM/YY      | HH:MM                          | DD/MM/YY        | HH:MM                            |
| g. Theatre                        | <input type="checkbox"/> | <input type="checkbox"/> | DD/MM/YY      | HH:MM                          | DD/MM/YY        | HH:MM                            |
| h. Other, <i>specify</i><br>_____ | <input type="checkbox"/> | <input type="checkbox"/> | DD/MM/YY      | HH:MM                          | DD/MM/YY        | HH:MM                            |

## SECTION 6: CHILD'S OUTCOME - Complete at whichever occurs first: at transfer, at death in hospital, or at the end of the first 72 hours post injury.

6.1 Please indicate the status or location of the child at whichever occurs first

(i.e. at transfer, at death in hospital, or at the end of the first 72 hours post injury)

- |                                                                           |                                                                 |                                                         |
|---------------------------------------------------------------------------|-----------------------------------------------------------------|---------------------------------------------------------|
| <input type="checkbox"/> Transferred → <i>Go to 6.2</i>                   | <input type="checkbox"/> Paediatric Intensive Care Unit (PICU)  | <input type="checkbox"/> Adult/General HDU              |
| <input type="checkbox"/> Discharged → <i>Go to 6.3</i>                    | <input type="checkbox"/> Paediatric High Dependency Unit (PHDU) | <input type="checkbox"/> Not known                      |
| <input type="checkbox"/> Deceased → <i>Go to 6.4</i>                      | <input type="checkbox"/> Paediatric Neurosurgical unit          | <input type="checkbox"/> Other, <i>specify</i><br>_____ |
| <input type="checkbox"/> General children's ward                          | <input type="checkbox"/> General/Adult ICU                      |                                                         |
| <input type="checkbox"/> Specialist children's ward, <i>specify</i> _____ | <input type="checkbox"/> Adult Neurosurgical unit               |                                                         |

### 6.2 Transferred

- 6.2.1 Was this a transfer or retrieval?  Transfer  Retrieval  Not known
- 6.2.2 Name of hospital and trust child transferred to (Hospital) \_\_\_\_\_  
(Trust) \_\_\_\_\_
- 6.2.3 Date and time first referral made for transfer DD/MM/YY HH:MM (24 hr clock)  Not recorded
- 6.2.4 First referral request for transfer accepted  Yes  No
- 6.2.5 Date and time departure for transfer DD/MM/YY HH:MM (24 hr clock)  Not recorded
- 6.2.6 Reason for transfer *(please tick all that apply)*
- |                                                                   |                                                                       |                                       |
|-------------------------------------------------------------------|-----------------------------------------------------------------------|---------------------------------------|
| <input type="checkbox"/> No paediatric facilities                 | <input type="checkbox"/> Access to paediatric neuroscience facilities | <input type="checkbox"/> Not recorded |
| <input type="checkbox"/> No ICU facilities in hospital            | <input type="checkbox"/> Paediatric surgery                           | <input type="checkbox"/> Not known    |
| <input type="checkbox"/> No PICU bed available in hospital        | <input type="checkbox"/> Receiving hospital close to child's home     |                                       |
| <input type="checkbox"/> No general ICU bed available in hospital | <input type="checkbox"/> Other, <i>please specify</i> _____           |                                       |
- 6.2.7 Means of transfer
- |                                                         |                                                                      |                                       |
|---------------------------------------------------------|----------------------------------------------------------------------|---------------------------------------|
| <input type="checkbox"/> Specialist PICU transport team | <input type="checkbox"/> Private/public transport                    | <input type="checkbox"/> Not recorded |
| <input type="checkbox"/> Local team                     | <input type="checkbox"/> Other land, <i>please specify</i> _____     | <input type="checkbox"/> Not known    |
| <input type="checkbox"/> Paramedic Ambulance            | <input type="checkbox"/> Helicopter (Paramedic/medic)                |                                       |
| <input type="checkbox"/> Ambulance (Non paramedic)      | <input type="checkbox"/> Other airborne, <i>please specify</i> _____ |                                       |
- 6.2.8 Additional transfer information (e.g. reason for delay )

## SECTION 6: CHILD'S OUTCOME *continued*

### 6.3 Discharged

- 6.3.1 Place child discharged to  Home  Rehab centre  
 Other, *specify* \_\_\_\_\_  Not known
- 6.3.2 Date of discharge DD/MM/YY  Not recorded
- 6.3.3 Time of discharge HH:MM (24 hr clock)  Not recorded
- 6.3.4 Diagnosis on discharge \_\_\_\_\_

### 6.4 Death (if a diagnosis of brain stem death is made then the date and time of this diagnosis equals the date and time of death)

- 6.4.1 Date of death DD/MM/YY  Not recorded
- 6.4.2 Time of death HH:MM (24 hr clock)  Not recorded
- 6.4.3 Place of death
- |                                                                           |                                                           |                                           |
|---------------------------------------------------------------------------|-----------------------------------------------------------|-------------------------------------------|
| <input type="checkbox"/> General children's ward                          | <input type="checkbox"/> General/Adult ICU                | <input type="checkbox"/> Theatre          |
| <input type="checkbox"/> Paediatric Intensive Care Unit (PICU)            | <input type="checkbox"/> Adult Neurosurgical unit         | <input type="checkbox"/> Short stay Unit  |
| <input type="checkbox"/> Paediatric Neurosurgical unit                    | <input type="checkbox"/> Adult High Dependency Unit (HDU) | <input type="checkbox"/> Observation unit |
| <input type="checkbox"/> Paediatric High Dependency Unit (PHDU)           | <input type="checkbox"/> Emergency Department             | <input type="checkbox"/> Home             |
| <input type="checkbox"/> Specialist children's ward, <i>specify</i> _____ | <input type="checkbox"/> Other, <i>specify</i> _____      | <input type="checkbox"/> Not known        |
- 6.4.4 Death certificate issued  Yes  No  Not known
- 6.4.5 Coroner's referral made  Yes  No  Not known
- 6.4.6 Cause of death (as stated on death certificate. If no certificate issued state cause of death as in notes)

#### For children who died <28 days old

- 1 \_\_\_\_\_
- 2a. \_\_\_\_\_
- 2b. \_\_\_\_\_
- 2c. \_\_\_\_\_
- 2d. \_\_\_\_\_

#### For deaths of a child (> 28 days old)

- 1a. \_\_\_\_\_
- 1b. \_\_\_\_\_
- 1c. \_\_\_\_\_
2. \_\_\_\_\_

### Additional space for further information (please indicate question number you are referring to)

**PLEASE PHOTOCOPY THIS FORM AND KEEP A COPY FOR YOUR RECORDS BEFORE RETURNING TO YOUR CMACE REGIONAL OFFICE**

### Speciality & Clinician Codes

| CODE | SPECIALITY                    | CODE | SPECIALITY                   | CODE       | CLINICIAN                                 |
|------|-------------------------------|------|------------------------------|------------|-------------------------------------------|
| 100  | General Surgery               | 302  | Endocrinology                | CONS       | Consultant                                |
| 110  | Trauma & Orthopaedics         | 303  | Clinical Haematology         | SG         | Staff Grade                               |
| 120  | Ear Nose Throat (ENT)         | 400  | Neurology                    | CF         | Clinical Fellow                           |
| 145  | Oral & Maxillo Facial Surgery | 401  | Clinical Neuro-Physiology    | AS         | Associate Specialist                      |
| 150  | Neurosurgery                  | 420  | Paediatrics                  | ST + 1-8   | Single Training e.g. ST4                  |
| 170  | Cardiothoracic Surgery        | 421  | Paediatric Neurology         | SpR + year | Specialist Registrar e.g. SpR2            |
| 171  | Paediatric Surgery            | 450  | Dental Medicine Specialities | FY + year  | Foundation year e.g. if year 1, enter FY1 |
| 180  | Emergency Medicine            | 460  | Medical Ophthalmology        | ENP        | Emergency Nurse Practitioner              |
| 190  | Anaesthetics                  | 600  | General Medical Practice     | APNP       | Advanced Paediatric Nurse Practitioner    |
| 192  | Critical Care Medicine        | 601  | General Dental Practice      | ATNC       | Nurse - Advance Trauma Cert               |
| 193  | Paediatric Intensive Care     | 810  | Radiology                    | RSCN       | Nurse - RSCN                              |
| 300  | General Medicine              | 823  | Haematology                  | NURS       | Nurse - General                           |
| 301  | Gastroenterology              | 000  | Other (Surgical or Medical)  | GP         | General Practitioner                      |



## Inclusion & exclusion criteria

### Please include:

- Children up to 15 years old (14 years and 364 days) who between 00:00 on the 1<sup>st</sup> September 09 and 23:59 on the 28<sup>th</sup> February 2010 have a brain or skull injury (trauma to the head) as a result of blunt or penetrating trauma or acceleration or deceleration force (e.g. road traffic accident, fall, shaking) **OR** who have experienced a head injury as part of a pattern of injuries or multi trauma **AND** fulfill the following length of stay criteria:

- ⇒ Admitted to an area of inpatient care (regardless of length of stay) **OR**
  - ⇒ Died in the hospital, including the Emergency Department **OR**
  - ⇒ Transferred to other hospital for specialist care or for an ICU/HDU bed **OR**
  - ⇒ Died at the scene or en route to the receiving hospital **OR**
  - ⇒ Transferred in to your hospital (regardless of length of stay)
- Definition of 'admission' can be found on the front of this form

### Please exclude:

- Children who have experienced primarily superficial or facial injuries which are *unlikely to be associated with a brain injury* (e.g. isolated or trivial facial (nose, ear, lip etc), scalp or auricular injuries)
- Children who do not meet the above inclusion criteria (i.e. children who do not die that are not admitted; children who have reached their 15<sup>th</sup> birthday at the time of injury).

| Examples of types of head injuries to be INCLUDED     | Examples of types of head injuries to be EXCLUDED                                                           |
|-------------------------------------------------------|-------------------------------------------------------------------------------------------------------------|
| <b>S02 Fracture of skull and facial bones, e.g.</b>   | <b>S00 Superficial Injuries, e.g.</b>                                                                       |
| Fracture of vault of skull                            | Superficial injury of scalp                                                                                 |
| Fracture of base of skull                             | Contusion of eyelid and periocular area                                                                     |
| Multiple fractures involving skull and facial bones   | Other superficial injuries of eyelid and periocular area                                                    |
| Fractures of other skull and facial bones             | Superficial injury of nose, ear, lip, or oral cavity                                                        |
| <b>S04 Injury of cranial nerves, e.g.</b>             | <b>S01 Open wound of head, e.g.</b>                                                                         |
| Injury of optic nerve and pathways                    | Scalp, eyelid and periocular area, nose, ear, cheek & temporomandibular area, lip & oral cavity.            |
| Injury of oculomotor nerve                            |                                                                                                             |
| <b>S06 Intracranial injury, e.g.</b>                  | <b>S02 Fracture of skull and facial bones, e.g.</b>                                                         |
| Concussion                                            | Fracture of tooth, mandible, nasal bones, orbital floor, malar & maxillary bones.                           |
| Traumatic cerebral oedema                             |                                                                                                             |
| Diffuse brain injury                                  | <b>S03 Dislocation, sprain &amp; strain of joints &amp; ligaments of head,</b>                              |
| Focal brain injury                                    | Dislocation of jaw, septal cartilage of nose, septal cartilage of nose, or tooth. Sprain and strain of jaw. |
| EDH (Extra Dural Haematoma)                           |                                                                                                             |
| Traumatic subdural/subarachnoid haemorrhage           | <b>S04 Injury of cranial nerves, e.g.</b>                                                                   |
|                                                       | Injury of trochlear nerve, trigeminal nerve, abducent nerve, facial nerve                                   |
| Intracranial injury with prolonged coma               |                                                                                                             |
| Other intracranial injuries                           | <b>S05 Injury of eye and orbit, e.g.</b>                                                                    |
| Intracranial injuries - unspecified                   | Injury of conjunctiva and corneal abrasion                                                                  |
| <b>S07 Crushing injury of head, e.g.</b>              | Contusion of eyeball and orbital tissues                                                                    |
| Crushing injury of the face                           | Ocular laceration and rupture with prolapse                                                                 |
| Crushing injury of the skull                          | Penetrating wound of orbit, or eyeball                                                                      |
| <b>S08 Traumatic amputation of part of head, e.g.</b> | Avulsion of eye                                                                                             |
| Traumatic amputations                                 | <b>S08 Traumatic amputation of part of head, e.g.</b>                                                       |
| Multiple injuries of head                             | Avulsion of scalp                                                                                           |
|                                                       | Traumatic amputation of ear                                                                                 |

**If you have any queries regarding the inclusion/exclusion criteria, please contact your CMACE regional office.**

#### CMACE East of England Office

Carol Hay, Regional Manager  
Box 111, Room 414, Clinical School  
Addenbrooke's Hospital, Hills Road  
Cambridge, CB2 0SP

T: 01223 330 356 or 351      E: [carol.hay@cmace.org.uk](mailto:carol.hay@cmace.org.uk)

#### CMACE East Midlands and Yorkshire and The Humber Office

Daniel Beever, Administrative Assistant  
Heeley Suite, Blades Enterprise Centre  
John Street, Sheffield  
S2 4SW

T: 0114 292 2492      E: [daniel.beever@cmace.org.uk](mailto:daniel.beever@cmace.org.uk)

#### CMACE London and South East Office

Dave Kimani, Administrative Assistant  
Lower ground floor, Chiltern Court  
188 Baker Street, London  
NW1 5SD

T: 020 7467 3224      E: [dave.kimani@cmace.org.uk](mailto:dave.kimani@cmace.org.uk)

#### CMACE North East Office (FAO Marjorie Renwick)

C/O CMACE Central Office  
Lower ground floor, Chiltern Court  
188 Baker Street, London  
NW1 5SD

T: 020 7467 3224      E: [headinjury@cmace.org.uk](mailto:headinjury@cmace.org.uk)

#### CMACE Northern Ireland Office

Terry Falconer, Project Manager  
The Health Promotion Agency  
18 Ormeau Avenue, Belfast  
BT2 8HS

T: 028 9027 9397      E: [terry.falconer@cmace.org.uk](mailto:terry.falconer@cmace.org.uk)

#### CMACE North West, West Midlands & Wales Office

Pamela Norris, Project Midwife  
Research Floor (5th Floor), St Mary's Hospital  
Oxford Road, Manchester  
M13 9WL

T: 0161 7016915      E: [pamela.norris@cmace.org.uk](mailto:pamela.norris@cmace.org.uk)

#### CMACE South West and Wessex Office

Jo Coffee, Regional CMACE Assistant  
Institute of Child Life & Health, Level D  
St Michaels Hospital, Southwell Street  
Bristol, BS2 8EG

T: 0117 928 5141 or 5143      E: [jo.coffee@cmace.org.uk](mailto:jo.coffee@cmace.org.uk)

#### CMACE Central Office

Rachael Davey, Projects Research Assistant  
Lower ground floor, Chiltern Court  
188 Baker Street, London  
NW1 5SD

T: 020 7467 3224      E: [rachael.davey@cmace.org.uk](mailto:rachael.davey@cmace.org.uk)
